# Supplementary material for: Fourier-Transform Infra-Red Microspectroscopy Can Accurately Diagnose Colitis and Assess Severity of Inflammation
Source: MDPI journal article supplement (doi:10.3390/ijms23052849), 2022-03-05
Supplement: s1 [file s1]

## Supplementary Data

**Supplementary Figure S1A. Partial least squares discriminant analysis model classifying bowel mucosal spectra for severe colitis compared with controls**

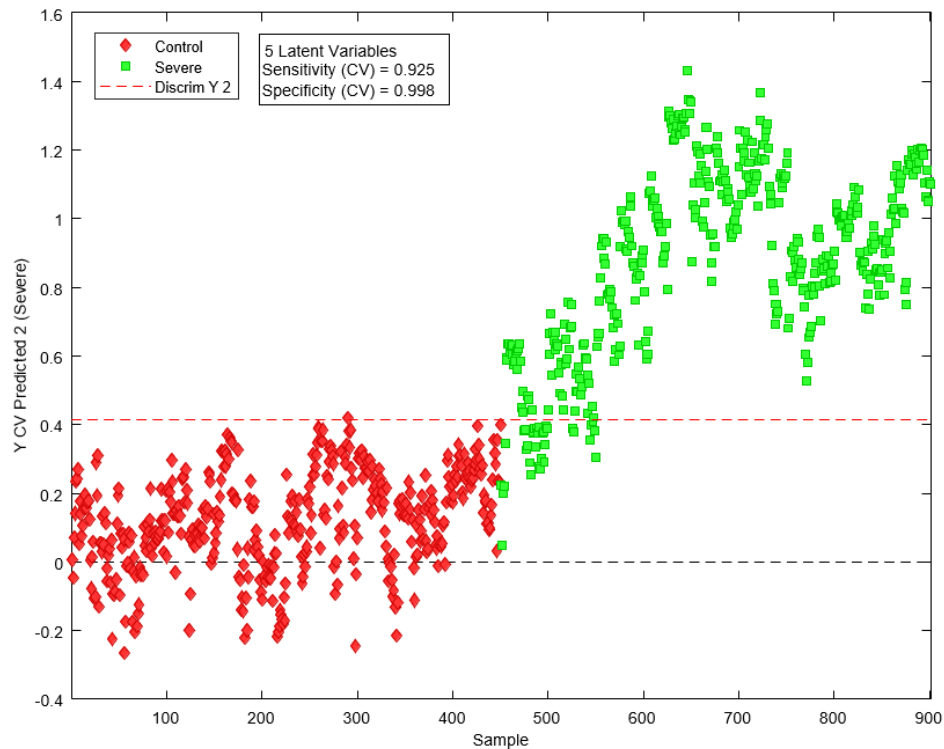

**Supplementary Figure S1B. All 5 latent variables included in the mucosal model classification for severe colitis**

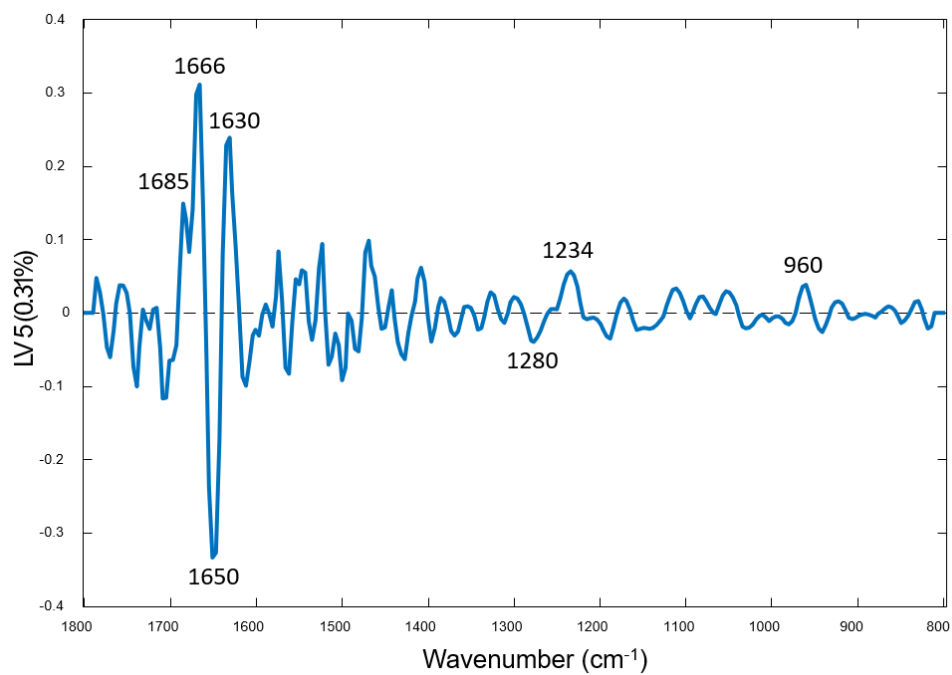

**Supplementary Figure S2A. Partial least squares discriminant analysis model classifying submucosa spectra for severe colitis compared with controls**

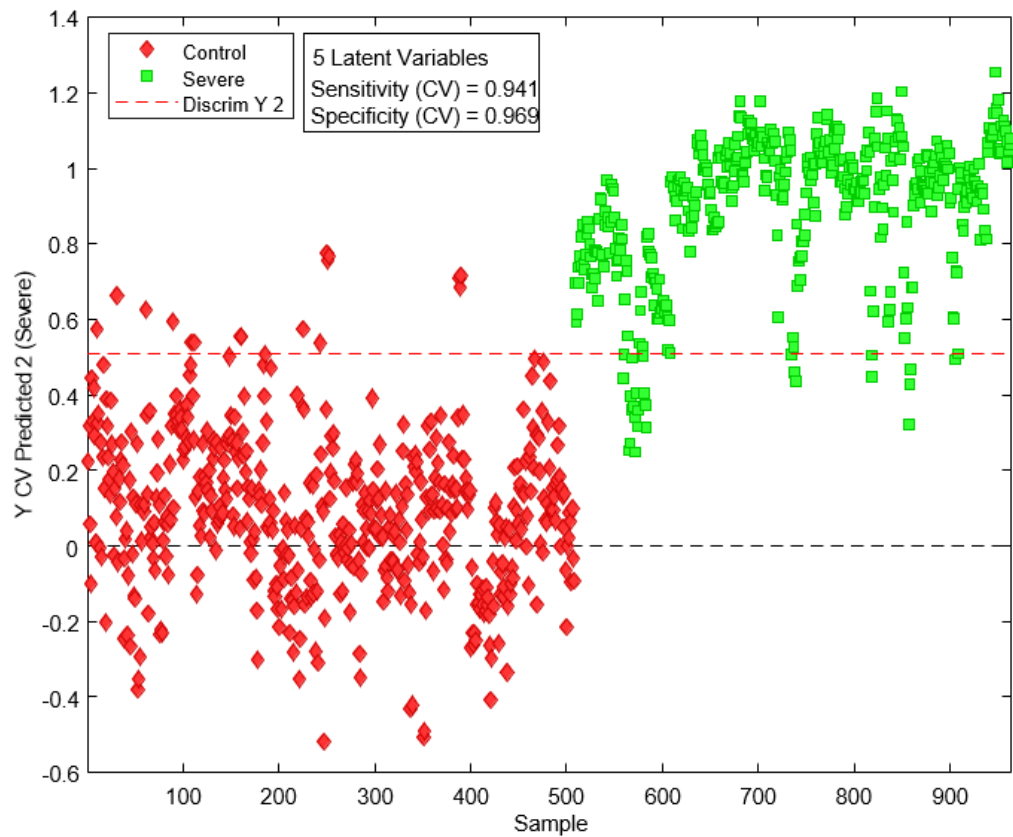

**Supplementary Figure S2B. All 5 latent variables included in the submucosal classification model for severe colitis**

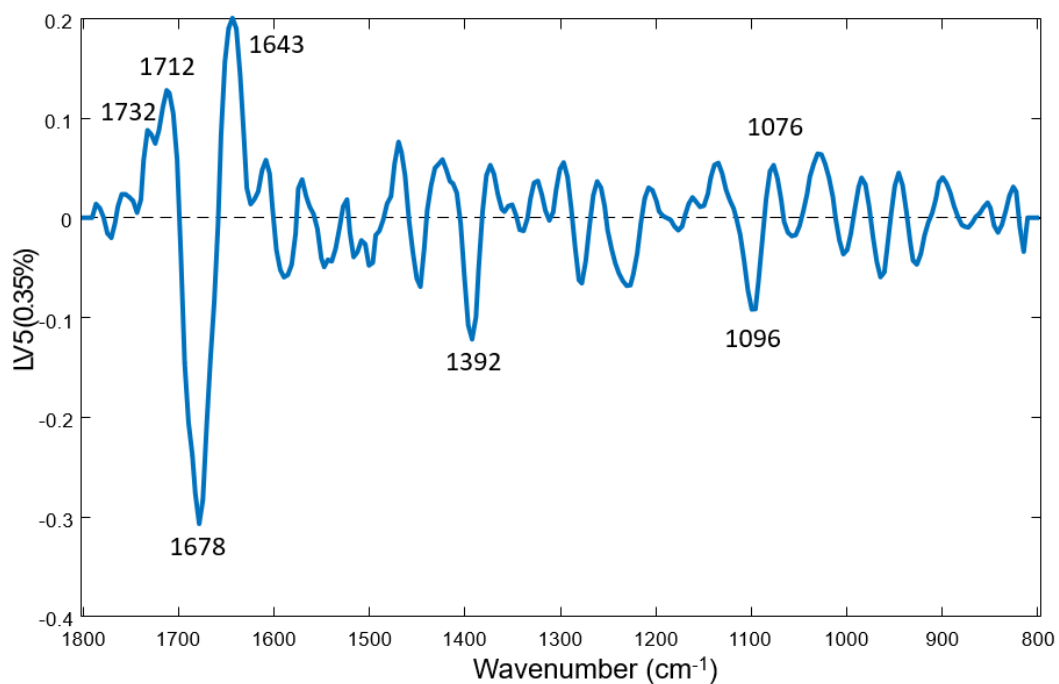

**Supplementary Figure S3A. Partial least squares discriminant analysis model classifying muscularis propria spectra for severe colitis compared with controls**

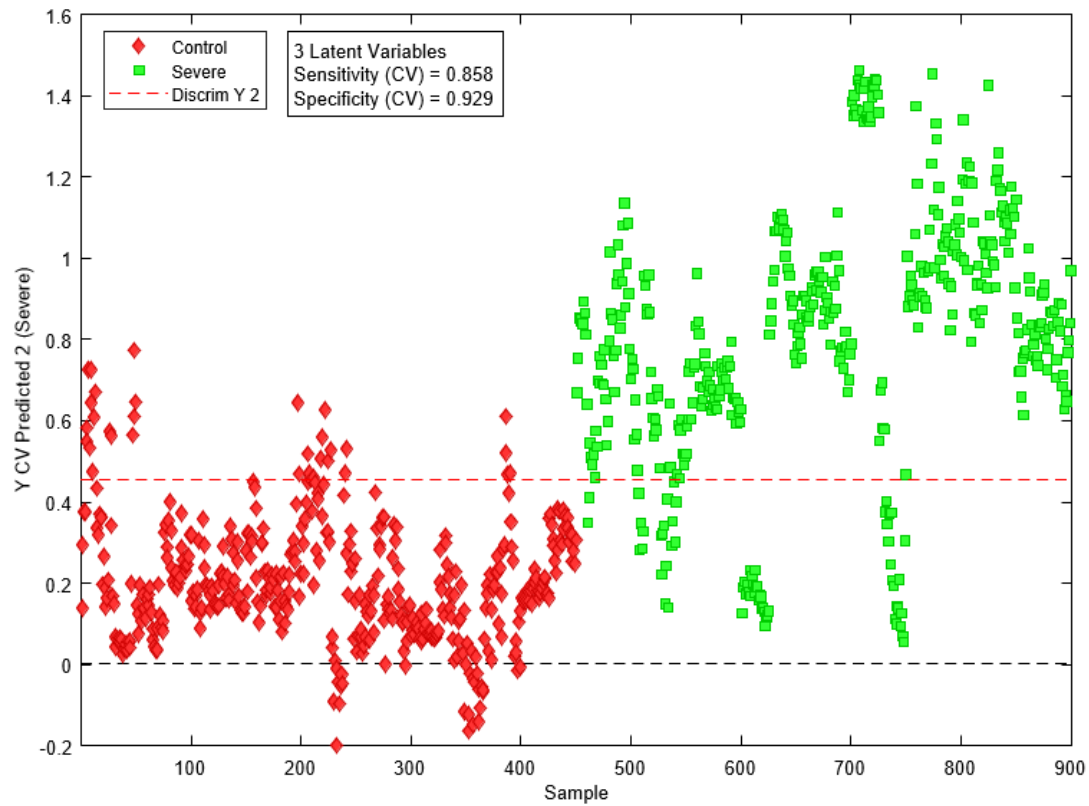

**Supplementary Figure S3B. All 3 latent variables included in the muscularis propria classification model for severe colitis**

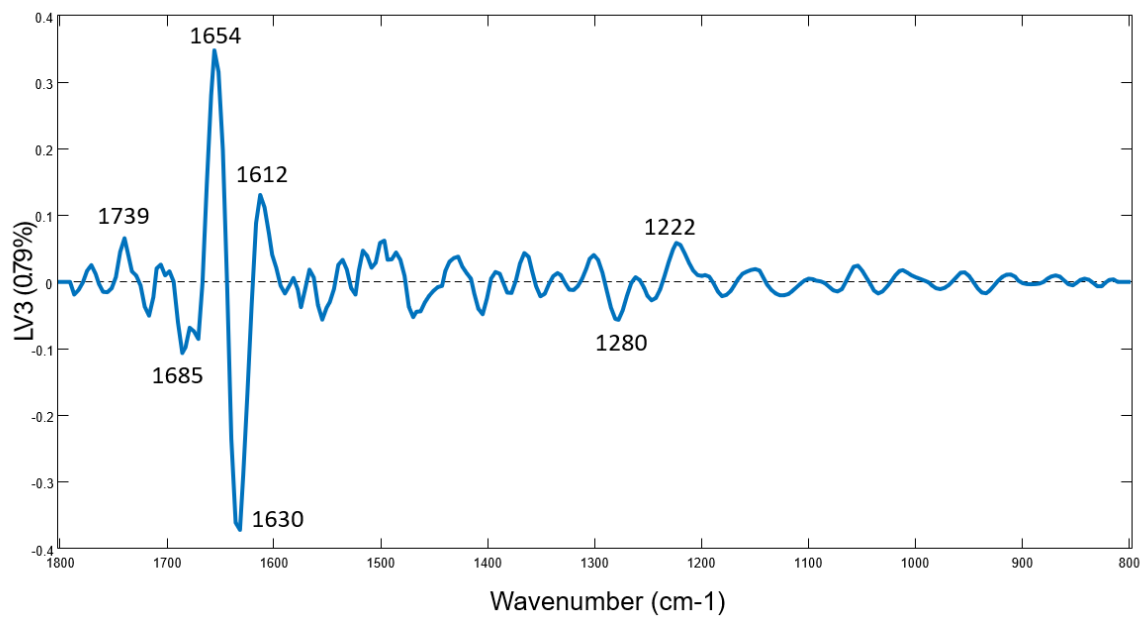

**Supplementary Figure S4. Hold-out partitions at 70% training, 30% testing stratified for severity of colitis**

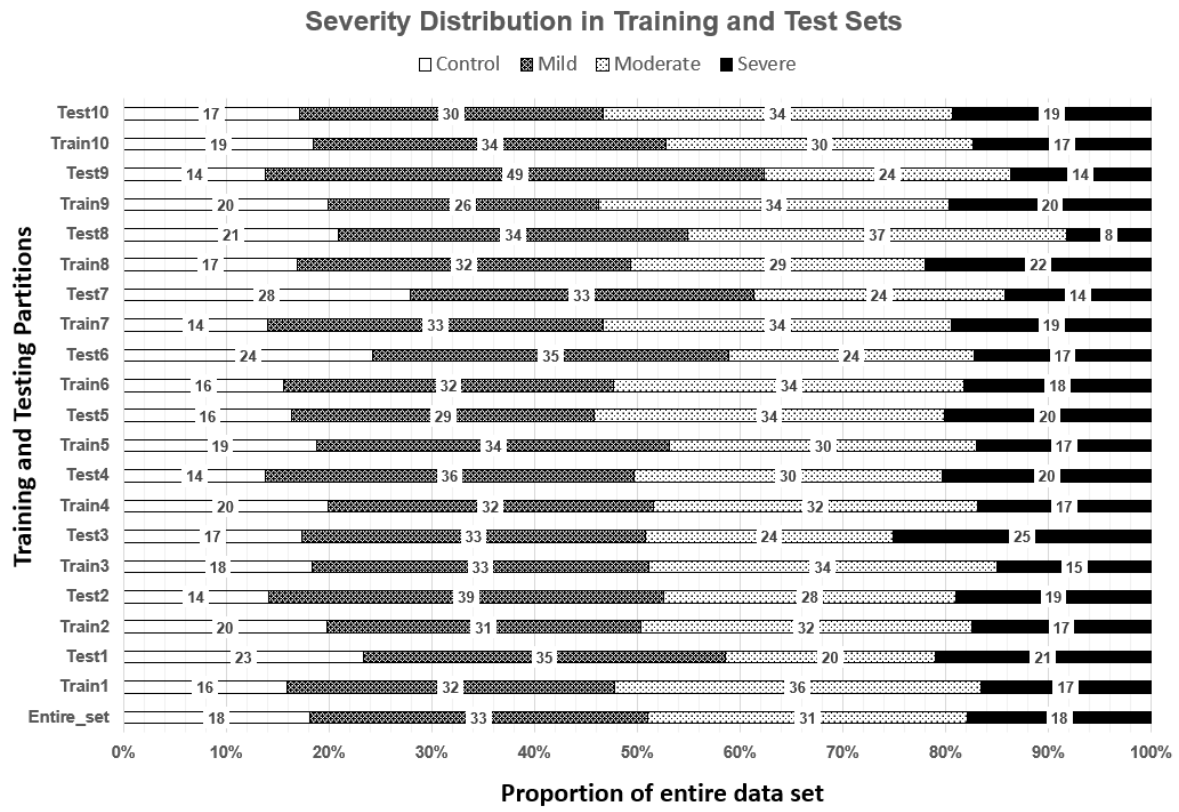

**Supplementary Table S1. Hyperparameters for machine learning models**

| <b>Bowel layer</b> | <b>No. of PCs (% data)</b> | <b>Classifier</b> | <b>Model parameter settings</b>                                                                                                   |
|--------------------|----------------------------|-------------------|-----------------------------------------------------------------------------------------------------------------------------------|
| <b>All layers</b>  | 15 (95%)                   | kNN               | 5 nearest neighbours, Euclidean, uniform weight                                                                                   |
|                    |                            | RF                | 10 trees, replicable training, subsets < 5 not split                                                                              |
|                    |                            | SVM               | RBF kernel, cost 10.0, gamma 0.01, 100 iterations                                                                                 |
|                    |                            | ANN               | Nodes in layers (15, 8, 6, 4), rectified linear activation function (ReLU), Adam solver, L2 regularisation 0.0001, 500 iterations |
|                    |                            | LR                | L1 Lasso regularisation, C parameter = 1                                                                                          |
| <b>MC</b>          | 13 (97%)                   | kNN               | 5 nearest neighbours, Euclidean, uniform weight                                                                                   |
|                    |                            | RF                | 10 trees, replicable training, subsets < 5 not split                                                                              |
|                    |                            | SVM               | RBF kernel, cost 10.0, gamma 0.01, 100 iterations                                                                                 |
|                    |                            | ANN               | Nodes in layers (13, 8, 6, 4), rectified linear activation function (ReLU), Adam solver, L2 regularisation 0.0001, 500 iterations |
|                    |                            | LR                | L1 Lasso regularisation, C parameter = 1                                                                                          |
| <b>SubMC</b>       | 22 (95%)                   | kNN               | 5 nearest neighbours, Euclidean, uniform weight                                                                                   |
|                    |                            | RF                | 10 trees, replicable training, subsets < 5 not split                                                                              |
|                    |                            | SVM               | RBF kernel, cost 10.0, gamma 0.01, 100 iterations                                                                                 |
|                    |                            | ANN               | Nodes in layers (22, 8, 6, 4), rectified linear activation function (ReLU), Adam solver, L2 regularisation 0.0001, 500 iterations |
|                    |                            | LR                | L1 Lasso regularisation, C parameter = 1                                                                                          |
| <b>MP</b>          | 10 (97%)                   | kNN               | 5 nearest neighbours, Euclidean, uniform weight                                                                                   |
|                    |                            | RF                | 10 trees, replicable training, subsets < 5 not split                                                                              |
|                    |                            | SVM               | RBF kernel, cost 10.0, gamma 0.01, 100 iterations                                                                                 |
|                    |                            | ANN               | Nodes in layers (10, 8, 6, 4), rectified linear activation function (ReLU), Adam solver, L2 regularisation 0.0001, 500 iterations |
|                    |                            | LR                | L1 Lasso regularisation, C parameter = 1                                                                                          |

kNN k-Nearest Neighbour, RF Random Forest, SVM Support Vector Machines, ANN Artificial Neural Network, LR Logistic Regression
